# Supplementary material for: Benchmarking the translational potential of spatial gene expression prediction from histology
Source: Springer Nature journal article supplement (doi:10.1038/s41467-025-56618-y), 2025-02-11
Supplement: MOESM1 [file 41467_2025_56618_MOESM1_ESM.pdf]

## Supplementary Information

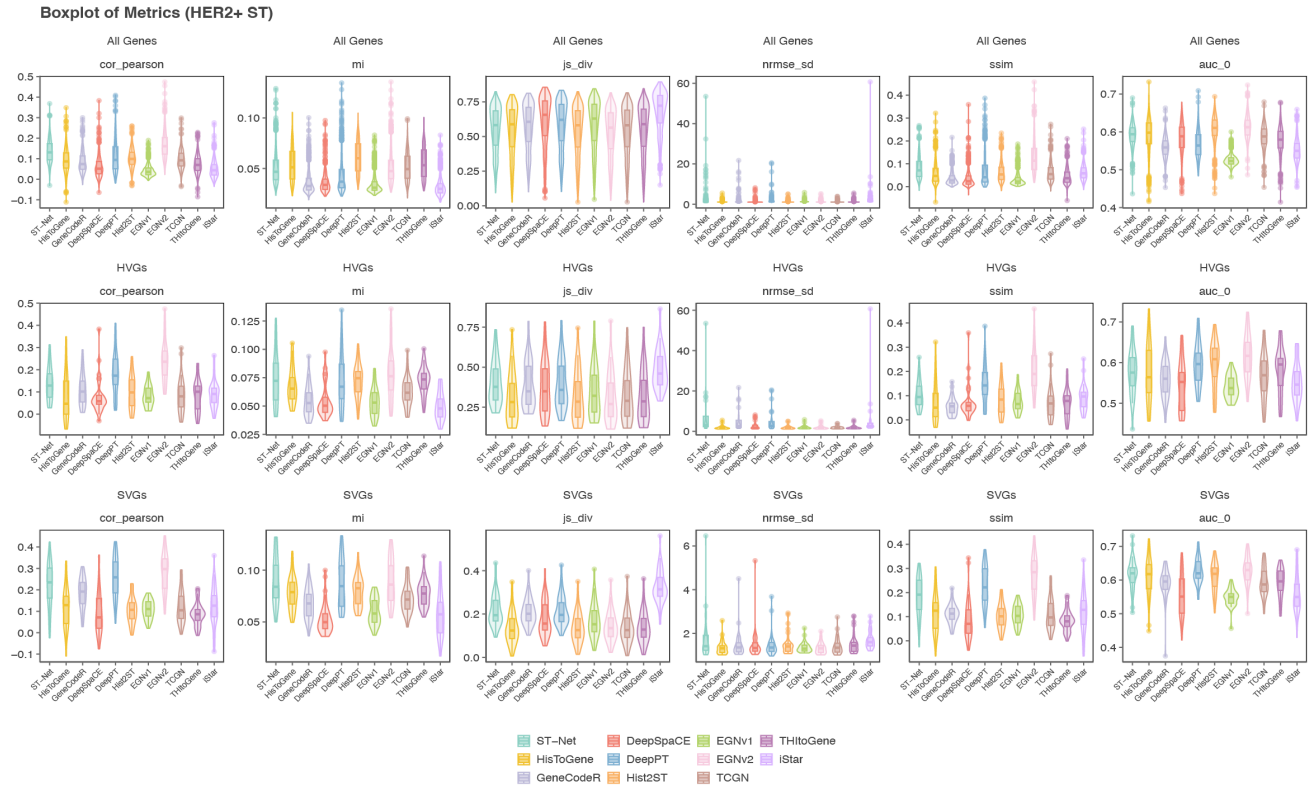

**Supplementary Fig. 1:** Violin and boxplots of evaluation metrics for gene expression of all genes ( $n = 785$ ), HVGs ( $n = 30$ ) and SVGs ( $n = 20$  per image sample) for each method in the HER2+ ST dataset. The bounds of the box correspond to the 25th percentile (first quartile) and 75th percentile (third quartile). The line within the box represents the median. The boxplot's lower whisker extends 1.5 times the interquartile range below the first quartile, while the upper whisker extends 1.5 times the interquartile range above the third quartile. Source data are provided as a Source Data file.

**Boxplot of Metrics (cSCC ST)**

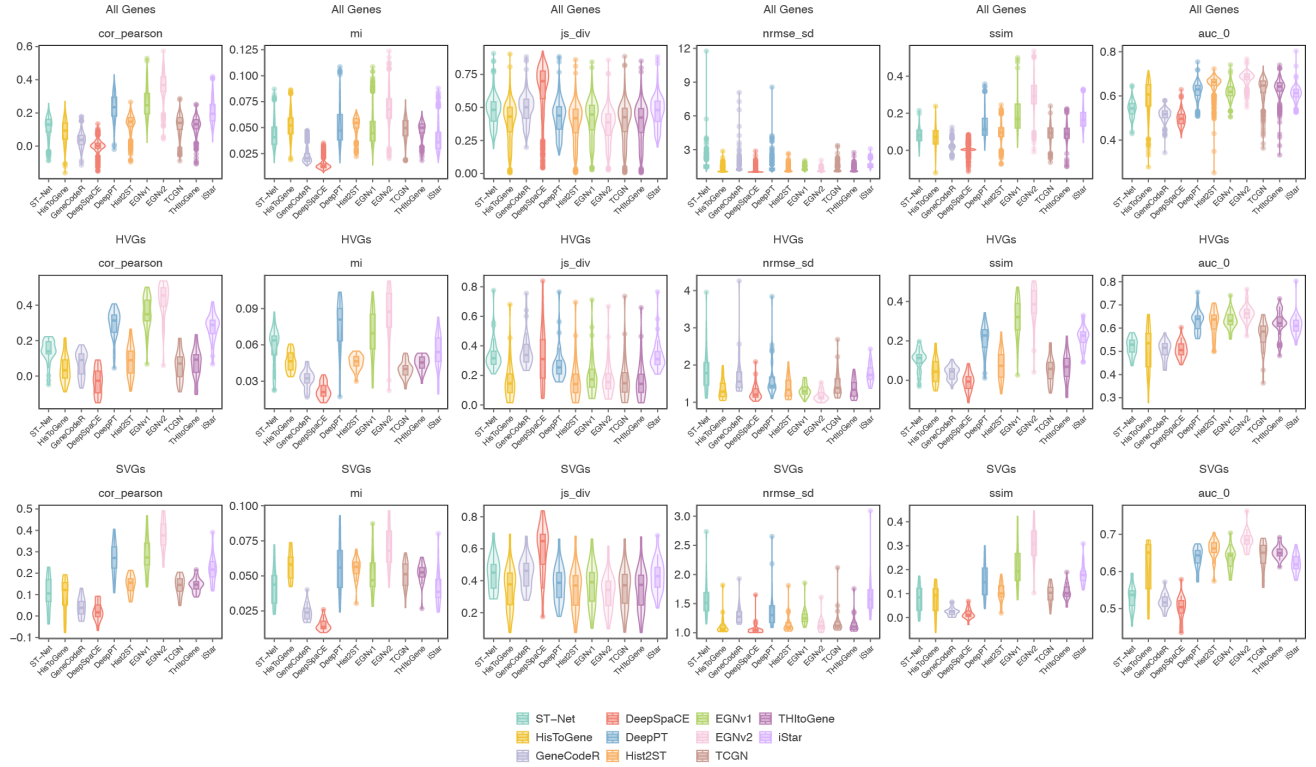

**Supplementary Fig. 2:** Violin and boxplots of evaluation metrics for gene expression of all genes ( $n = 997$ ), HVGs ( $n = 35$ ) and SVGs ( $n = 20$  per image sample) for each method in the cSCC ST dataset. The bounds of the box correspond to the 25th percentile (first quartile) and 75th percentile (third quartile). The line within the box represents the median. The boxplot's lower whisker extends 1.5 times the interquartile range below the first quartile, while the upper whisker extends 1.5 times the interquartile range above the third quartile. Source data are provided as a Source Data file.

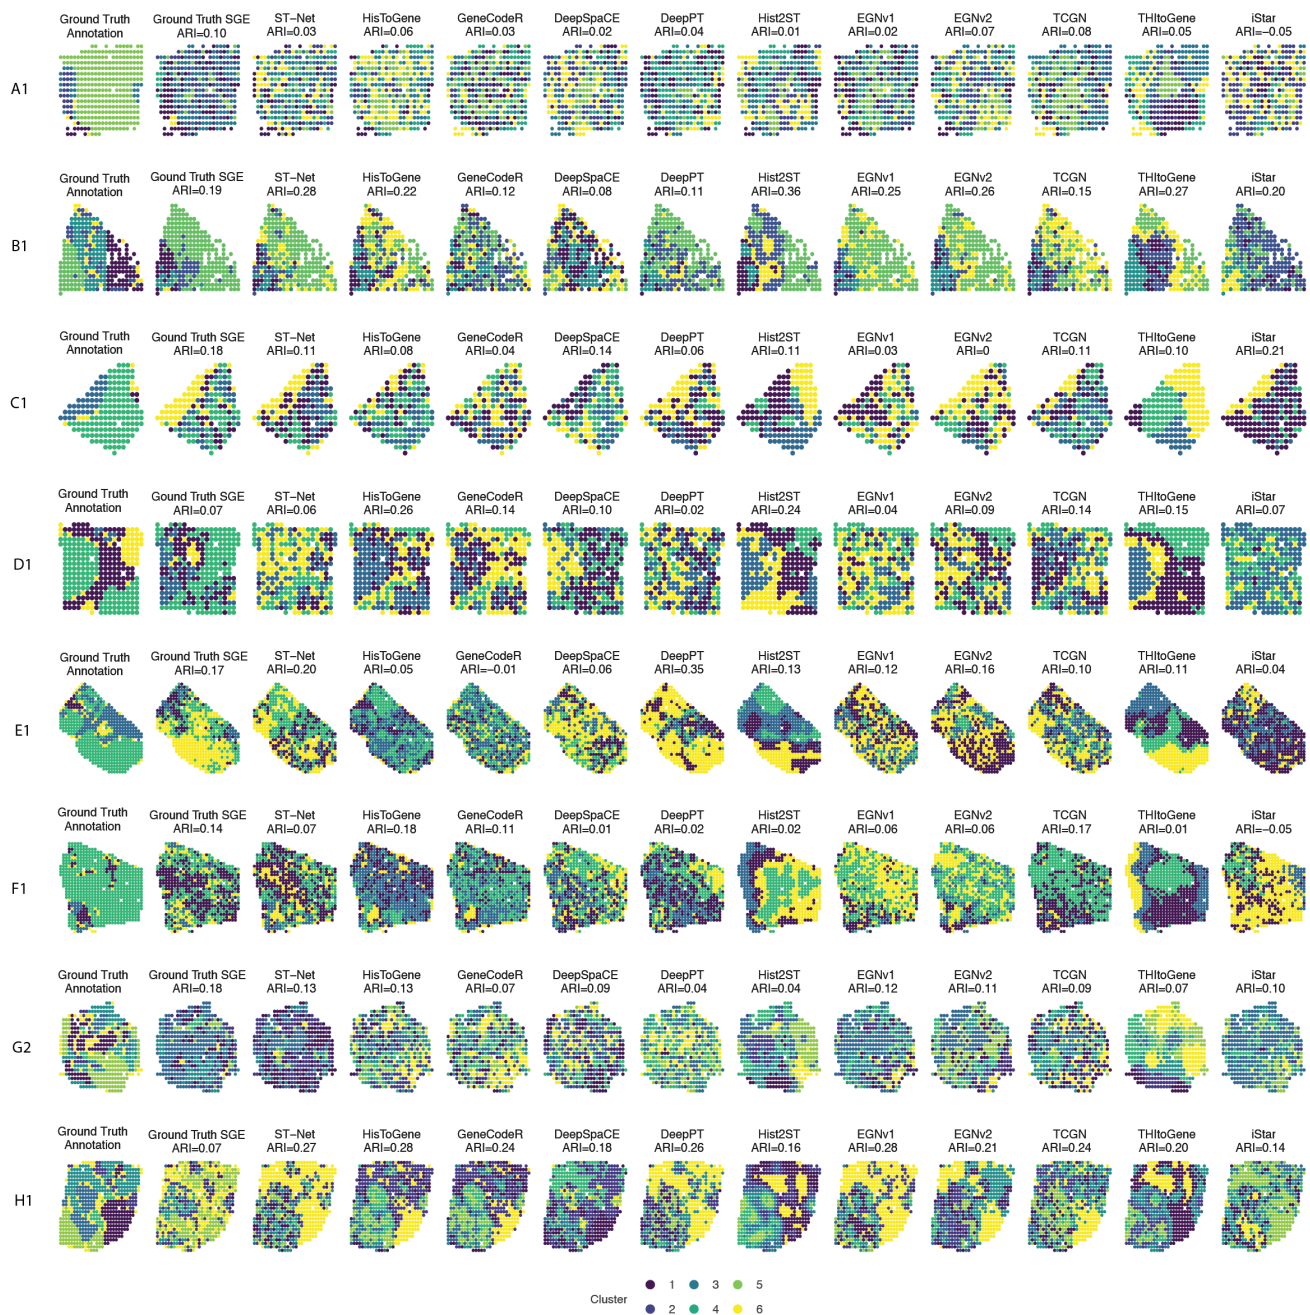

**Supplementary Fig. 3:** K-means clustering of spatial regions based on eight samples from HER2+ ST dataset was performed using predicted gene expression of each method. The ground truth annotations are based on manual delineation by pathologists, while the ground truth SGE is derived from sequencing data. Adjusted Rand Index (ARI) was calculated between the ground truth annotations and the clustering results of each method. In sample B1, Hist2ST had the best performance, achieving the highest ARI of 0.36, followed by ST-Net with an ARI of 0.28 and THltoGene with 0.27. These methods outperformed the ground truth SGE, which had an ARI of 0.19. Source data are provided as a Source Data file.

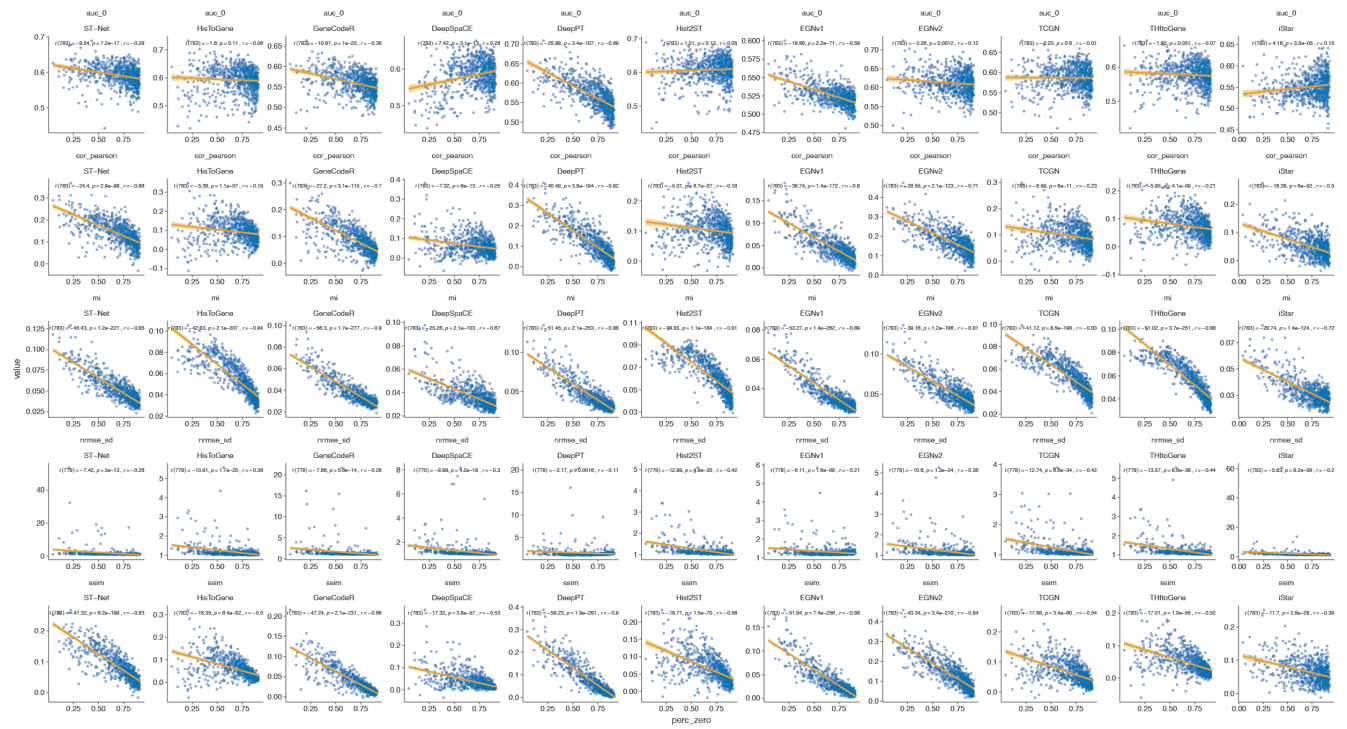

**Supplementary Fig. 4:** Gene expression prediction evaluation metrics vs. the percentage of zeros in each gene for each method. The solid line indicates the line of best fit, while the error band represents the 95% confidence interval (CI). The test statistics, degrees of freedom, p-values and effect sizes from a correlation test are shown on each panel. Source data are provided as a Source Data file.



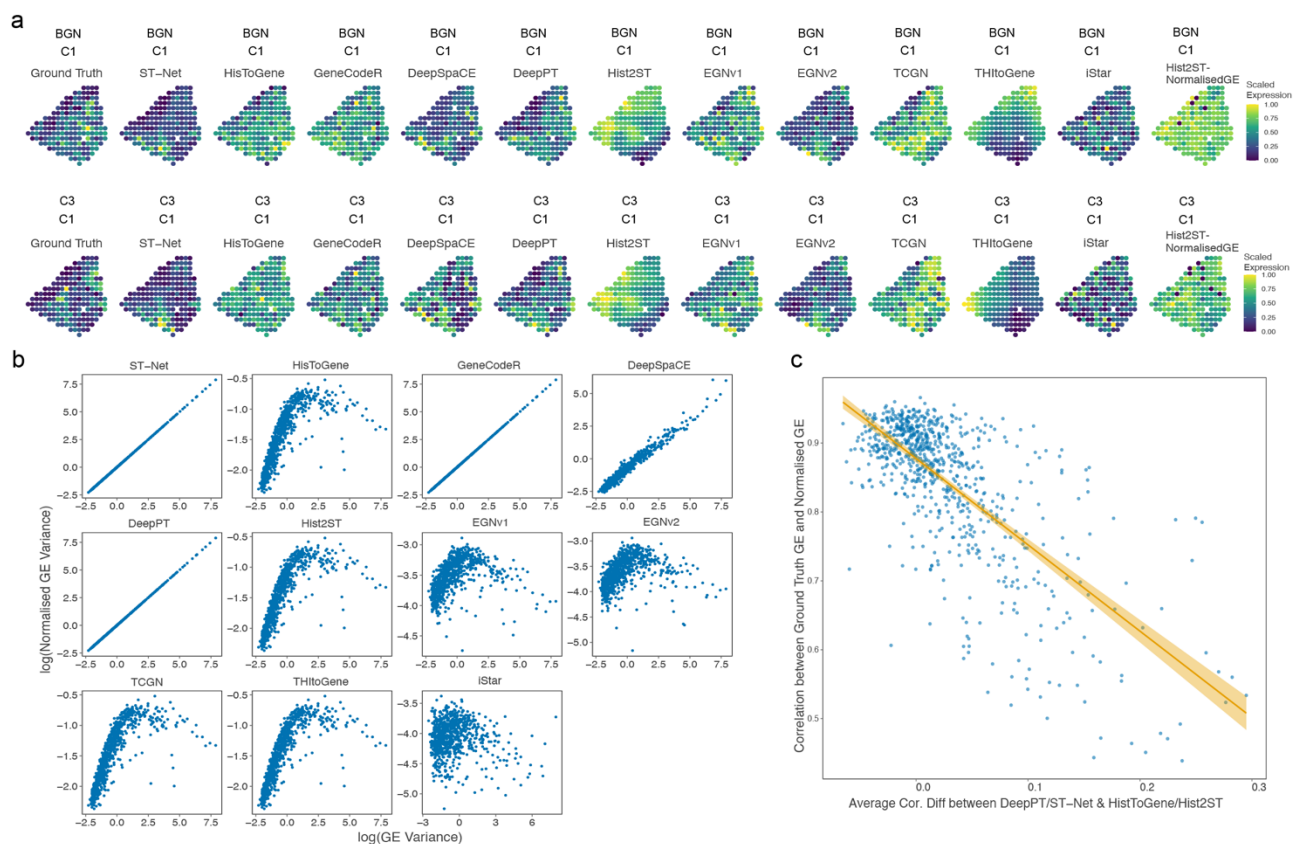

**Supplementary Fig. 5: Evaluation of gene expression prediction and normalisation in HER2+ ST dataset.** (a) Spatial plots of predicted gene expression of BGN and C3 at each spot in an HER2+ ST image in the test set of each method. Genes were chosen as they had high correlation in DeepPT/ST-Net and low correlation in Hist2ST/HisToGene. Ground truth (leftmost column) and normalised gene expression (rightmost column) values are also plotted. (b) Scatterplot of gene expression variance in the HER2+ ST dataset before (x-axis) and after normalisation (y-axis) for each method. (c) Scatterplot of average correlation difference between average correlation of both DeepPT/ST-Net & average correlation of both HisToGene/Hist2ST and the correlation between ground truth and normalisation (y-axis). Each point represents a gene in the HER2+ ST dataset ( $n = 785$ ). The solid line indicates the line of best fit, while the error band represents the 95% CI. Source data are provided as a Source Data file.

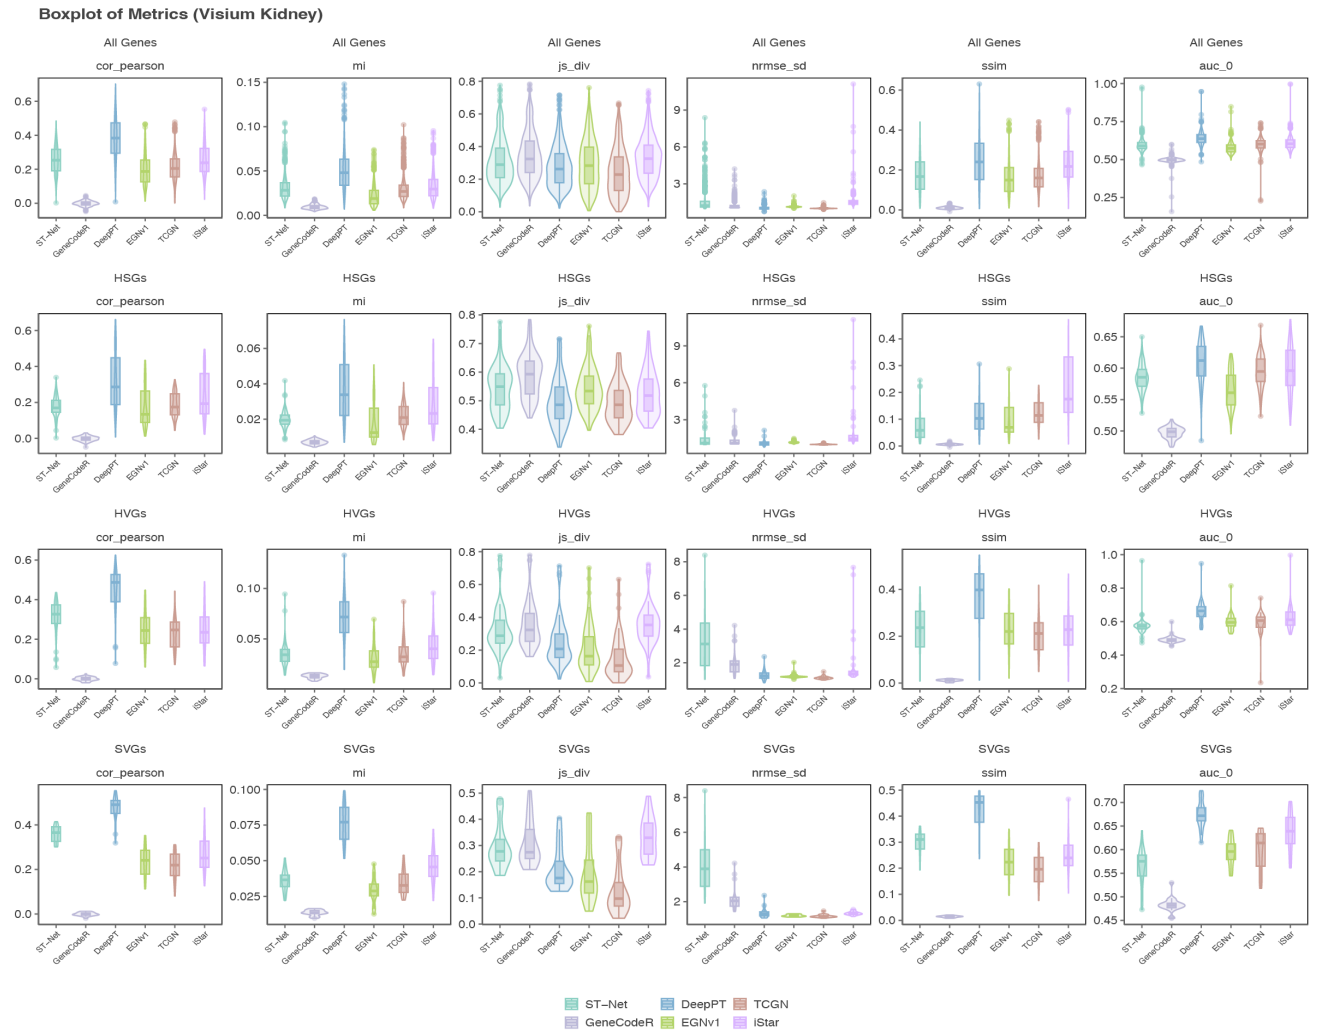

**Supplementary Fig. 6:** Violin and boxplots of evaluation metrics for gene expression of all genes ( $n = 992$ ), HSGs ( $n = 145$ ), HVGs ( $n = 48$ ) and SVGs ( $n = 20$ ) for each method in the Visium-Kidney dataset. The bounds of the box correspond to the 25th percentile (first quartile) and 75th percentile (third quartile). The line within the box represents the median. The boxplot's lower whisker extends 1.5 times the interquartile range below the first quartile, while the upper whisker extends 1.5 times the interquartile range above the third quartile. Source data are provided as a Source Data file.

## Gene Variation (Visium-Kidney)

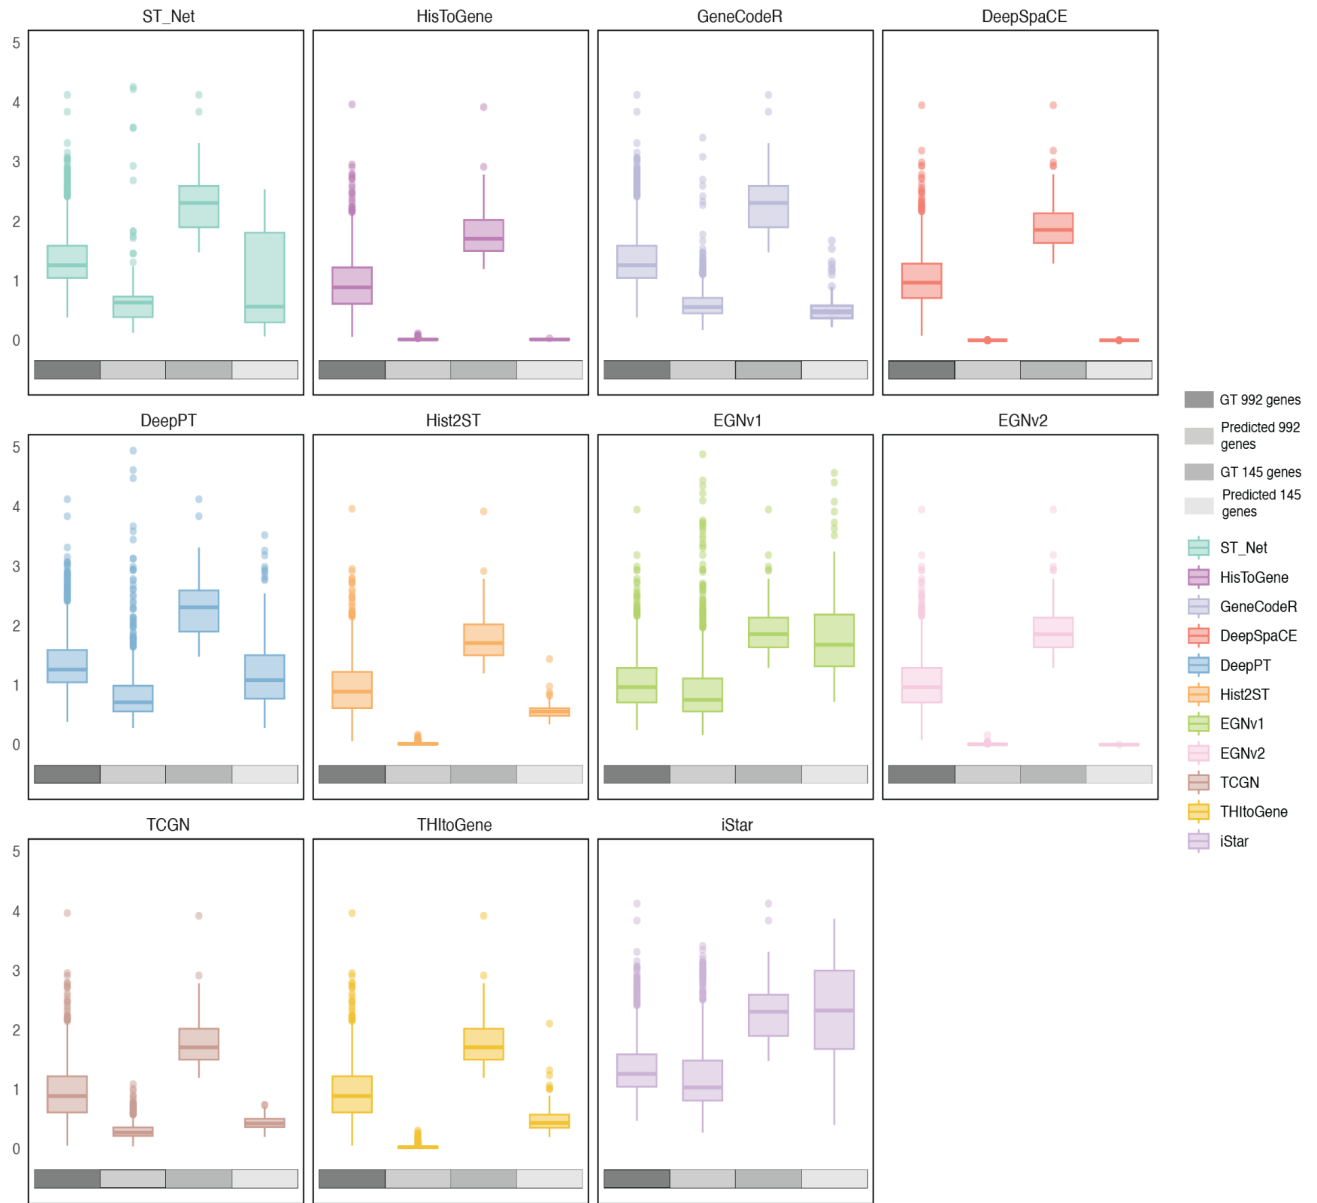

**Supplementary Fig. 7:** Coefficient of variation for ground truth and predicted 992 genes, and ground truth and predicted 145 HSGs across spots in the Visium-Kidney dataset. The bounds of the box correspond to the 25th percentile (first quartile) and 75th percentile (third quartile). The line within the box represents the median. The boxplot's lower whisker extends 1.5 times the interquartile range below the first quartile, while the upper whisker extends 1.5 times the interquartile range above the third quartile. Outliers are shown as individual data points. Source data are provided as a Source Data file.

# Gene Variation (Visium-HER2+)

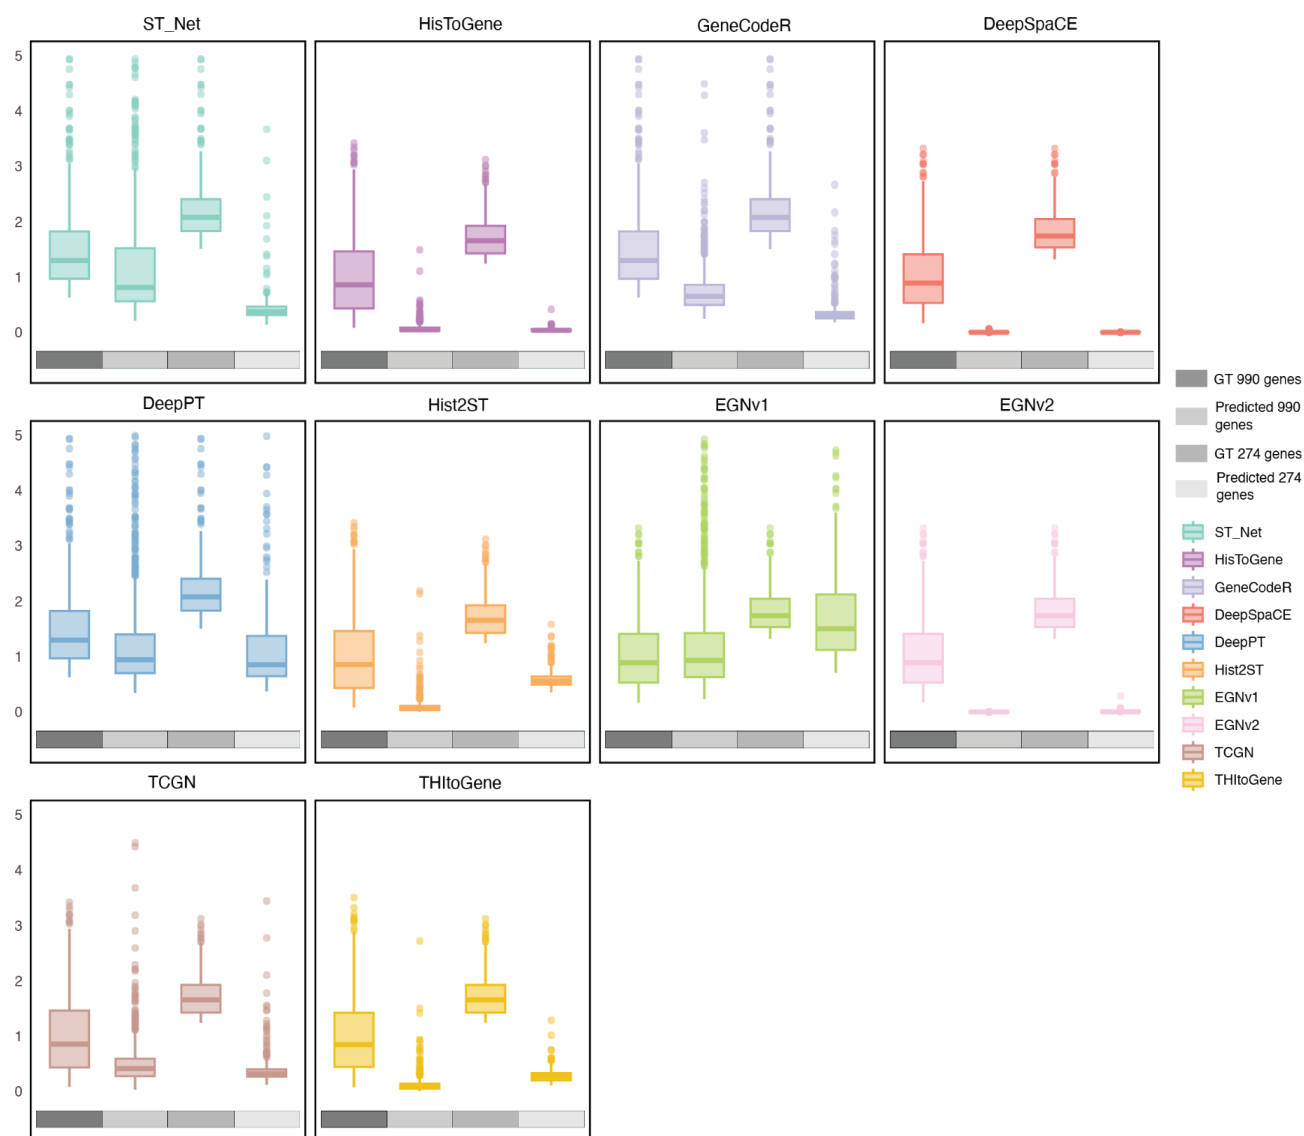

**Supplementary Fig. 8:** Coefficient of variation for ground truth and predicted 990 genes, and ground truth and predicted 274 HSGs across spots in the Visium-HER2+ dataset. The bounds of the box correspond to the 25th percentile (first quartile) and 75th percentile (third quartile). The line within the box represents the median. The boxplot's lower whisker extends 1.5 times the interquartile range below the first quartile, while the upper whisker extends 1.5 times the interquartile range above the third quartile. Outliers are shown as individual data points. Source data are provided as a Source Data file.



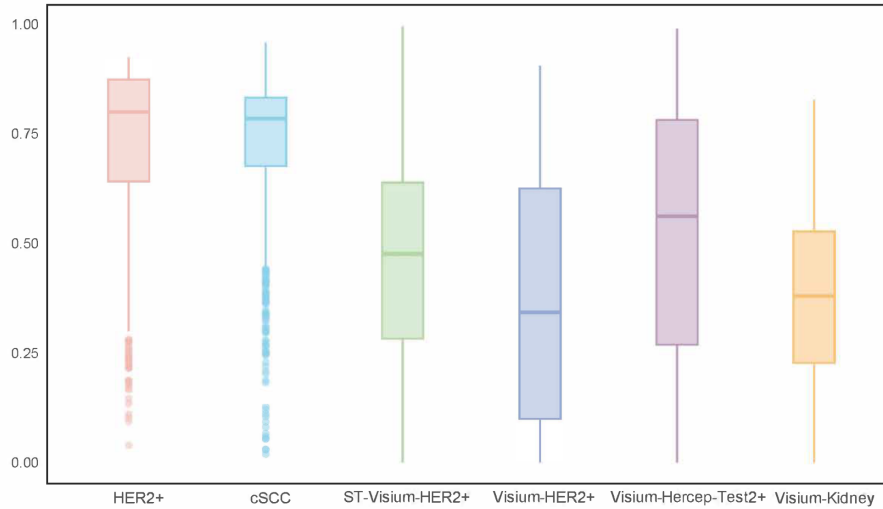

**Supplementary Fig. 9:** Gene expression matrix sparsity across different datasets. HER2+ ( $n = 785$ ) and cSCC ( $n = 997$ ) refer to the sparsity of the gene sets used for the ST data training and predictions. ST-Visium-HER2+ ( $n = 762$ ) refers to the sparsity of the Visium-HER2+ gene set used for validating HER2+ ST trained models. Visium-HER2+ ( $n = 990$ ) and Visium-Hercep-Test2+ ( $n = 990$ ) represent the sparsity of gene sets used for training and prediction in the Visium Breast Cancer models, respectively. Visium-Kidney ( $n = 992$ ) represents the sparsity of the gene sets in the Visium-Kidney dataset. The bounds of the box correspond to the 25th percentile (first quartile) and 75th percentile (third quartile). The line within the box represents the median. The boxplot's lower whisker extends 1.5 times the interquartile range below the first quartile, while the upper whisker extends 1.5 times the interquartile range above the third quartile. Outliers are shown as individual data points. Source data are provided as a Source Data file.

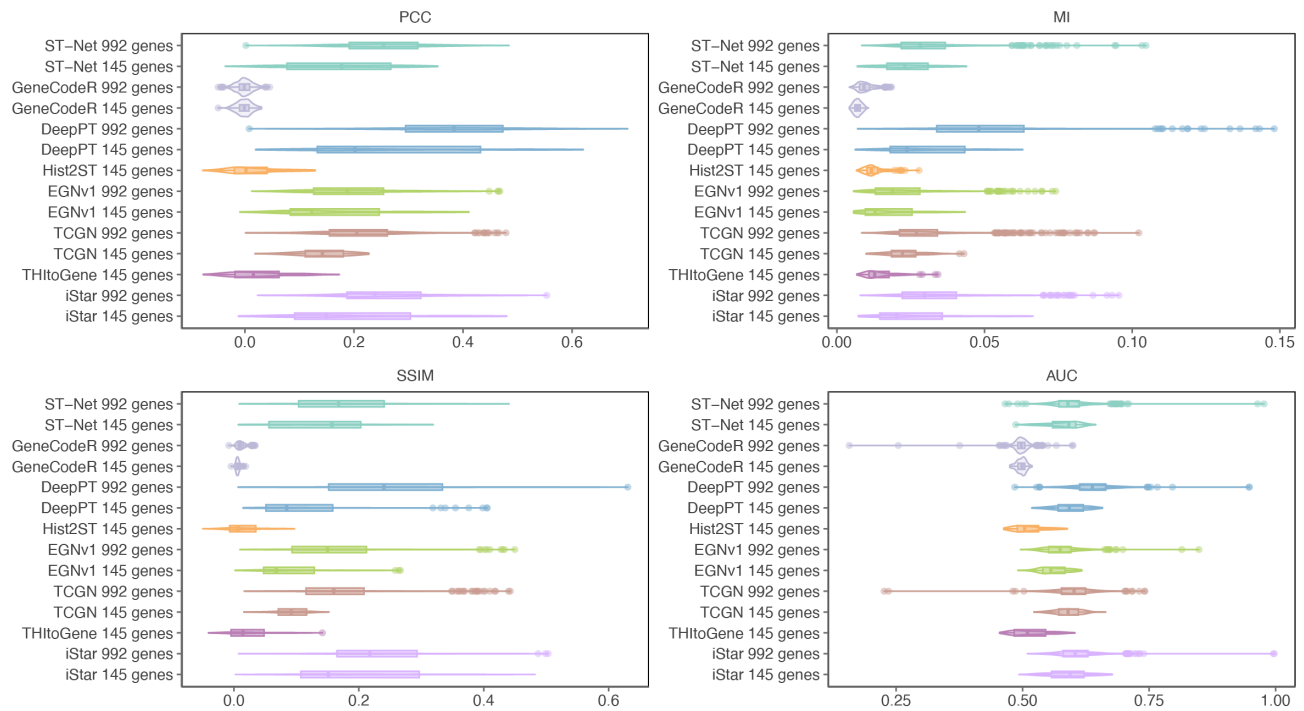

**Supplementary Fig. 10:** Violin and boxplots of the average PCC, MI, SSIM and AUC between the ground truth gene expression and predicted gene expression. Metrics measured from the test fold of a 4-fold CV, averaged over each gene across all 992 genes and 145 HSGs in the Visium-Kidney dataset. The bounds of the box correspond to the 25th percentile (first quartile) and 75th percentile (third quartile). The line within the box represents the median. The boxplot's lower whisker extends 1.5 times the interquartile range below the first quartile, while the upper whisker extends 1.5 times the interquartile range above the third quartile. Source data are provided as a Source Data file.

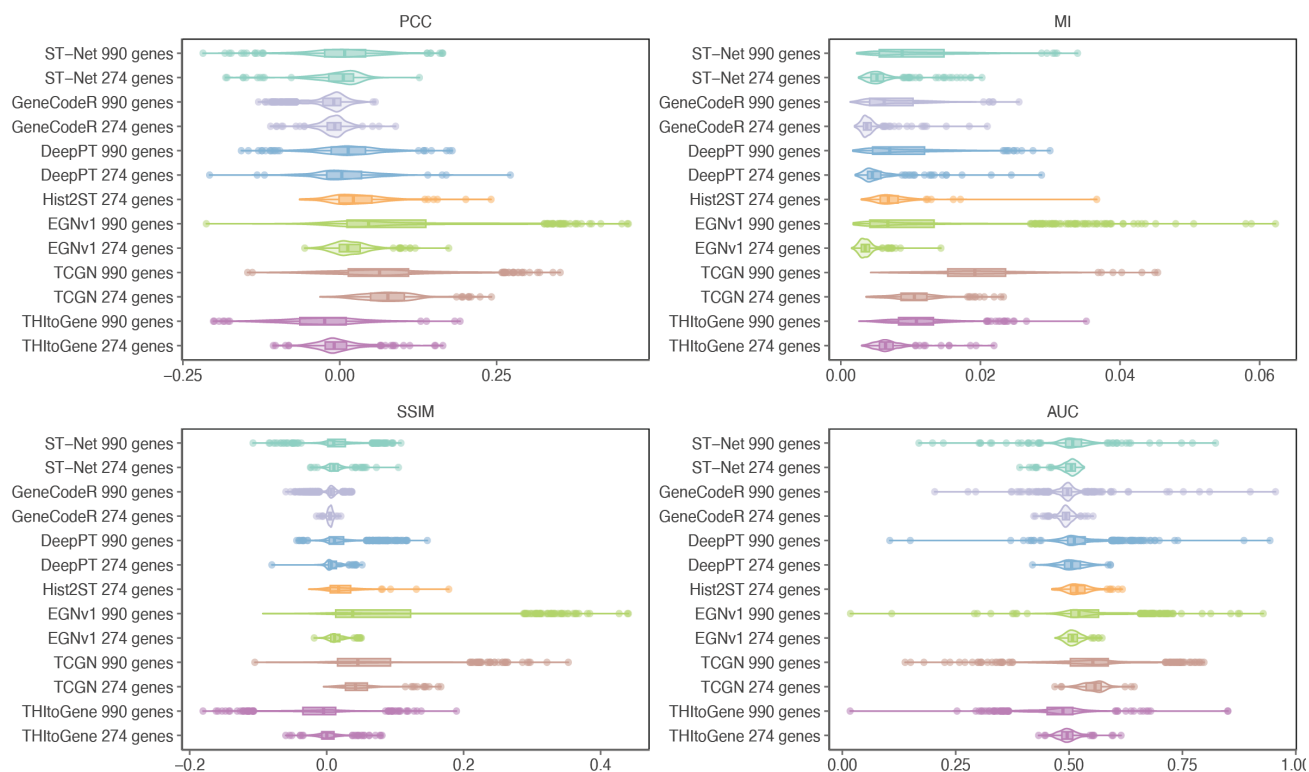

**Supplementary Fig. 11:** Violin and boxplots of the average PCC, MI, SSIM and AUC between the ground truth gene expression and predicted gene expression. Metrics measured from the test fold of a 4-fold CV, averaged over each gene across all 990 genes and 274 HSGs in the Visium-HER2+ dataset. The bounds of the box correspond to the 25th percentile (first quartile) and 75th percentile (third quartile). The line within the box represents the median. The boxplot's lower whisker extends 1.5 times the interquartile range below the first quartile, while the upper whisker extends 1.5 times the interquartile range above the third quartile. Source data are provided as a Source Data file.

**Boxplot of Metrics (Visium-HER2+)**

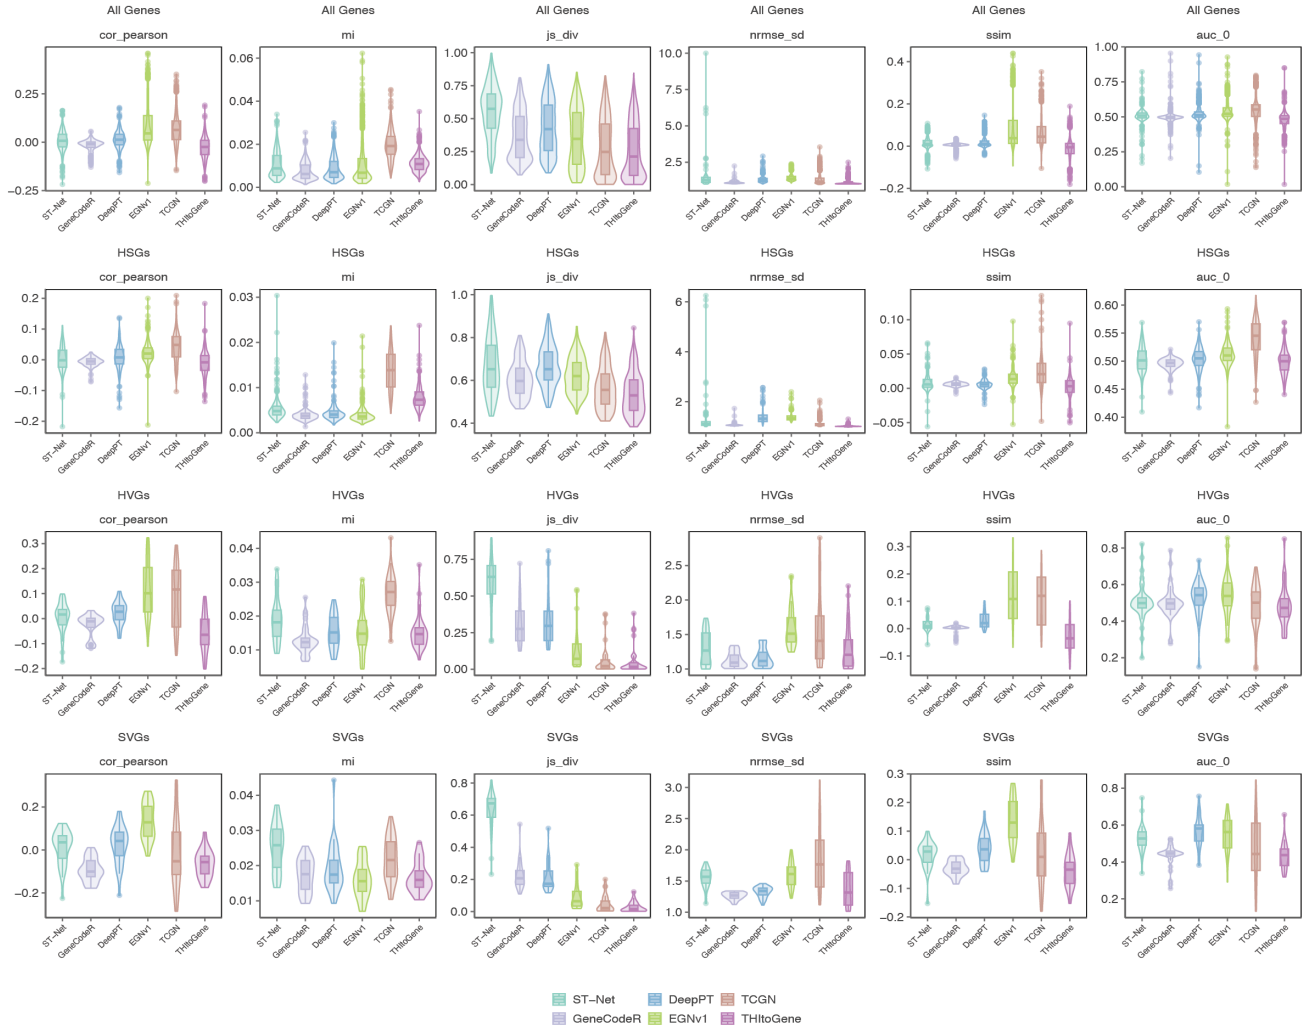

**Supplementary Fig. 12:** Violin and boxplots of evaluation metrics for gene expression of all genes ( $n = 990$ ), HSGs ( $n = 274$ ), HVGs ( $n = 36$ ) and SVGs ( $n = 20$  per image sample) for each method in the Visium-HER2+ dataset. The bounds of the box correspond to the 25th percentile (first quartile) and 75th percentile (third quartile). The line within the box represents the median. The boxplot's lower whisker extends 1.5 times the interquartile range below the first quartile, while the upper whisker extends 1.5 times the interquartile range above the third quartile. Source data are provided as a Source Data file.



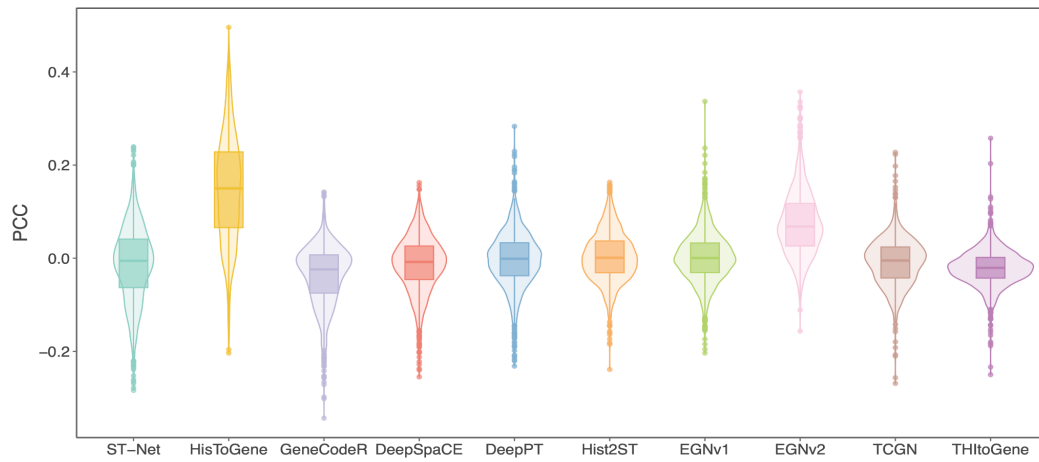

**Supplementary Fig. 13:** Violin and boxplots of gene-level correlations between ground truth and predicted gene expression ( $n = 762$ ) across two adjacent tissue slides from Visium-HER2+. The models were trained on the HER2+ ST dataset, with the best-performing model selected based on 4-fold cross-validation. The bounds of the box correspond to the 25th percentile (first quartile) and 75th percentile (third quartile). The line within the box represents the median. The boxplot's lower whisker extends 1.5 times the interquartile range below the first quartile, while the upper whisker extends 1.5 times the interquartile range above the third quartile. Source data are provided as a Source Data file.

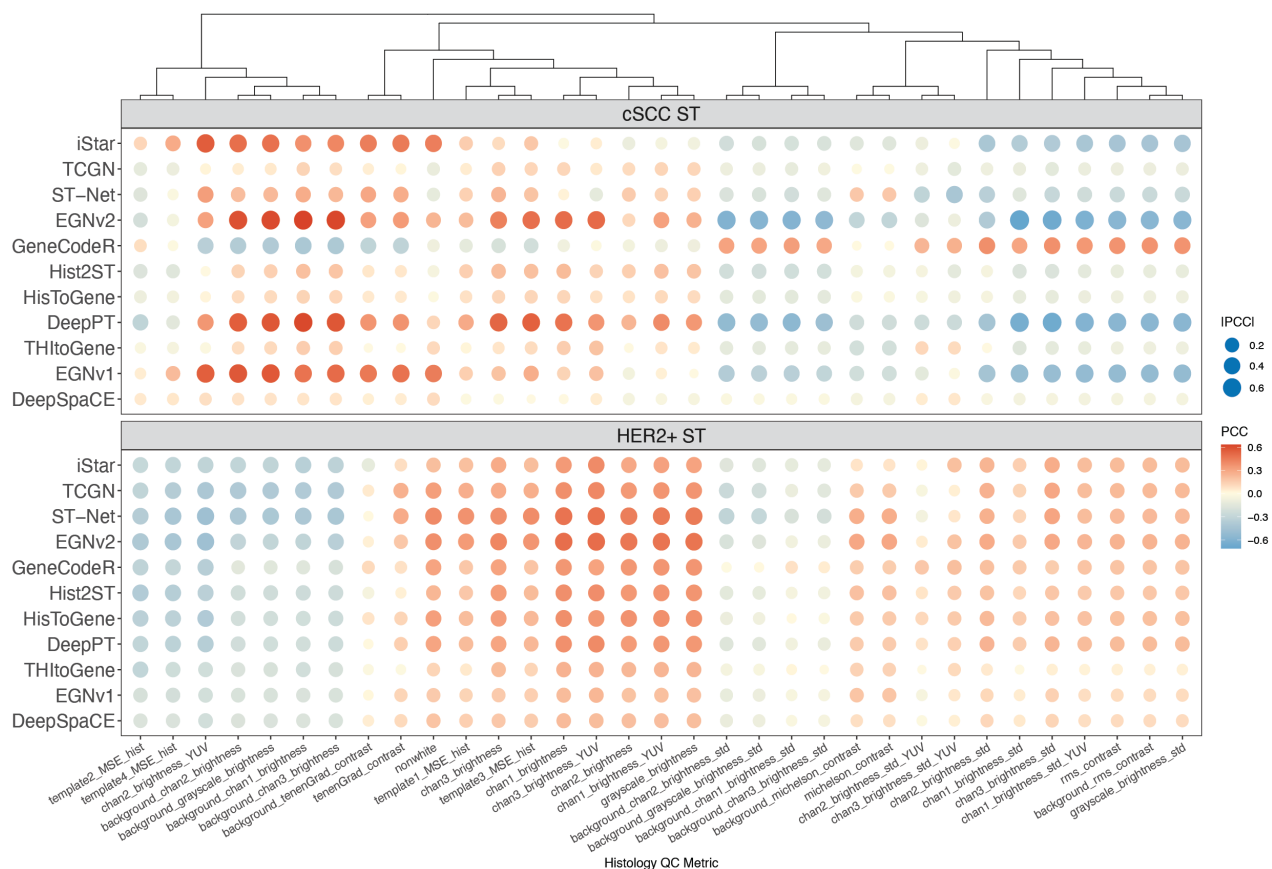

**Supplementary Fig. 14:** Dotplot of correlation between various histology QC metrics and gene-level correlations for each method in the HER2+ ST dataset and the cSCC ST dataset. Source data are provided as a Source Data file.

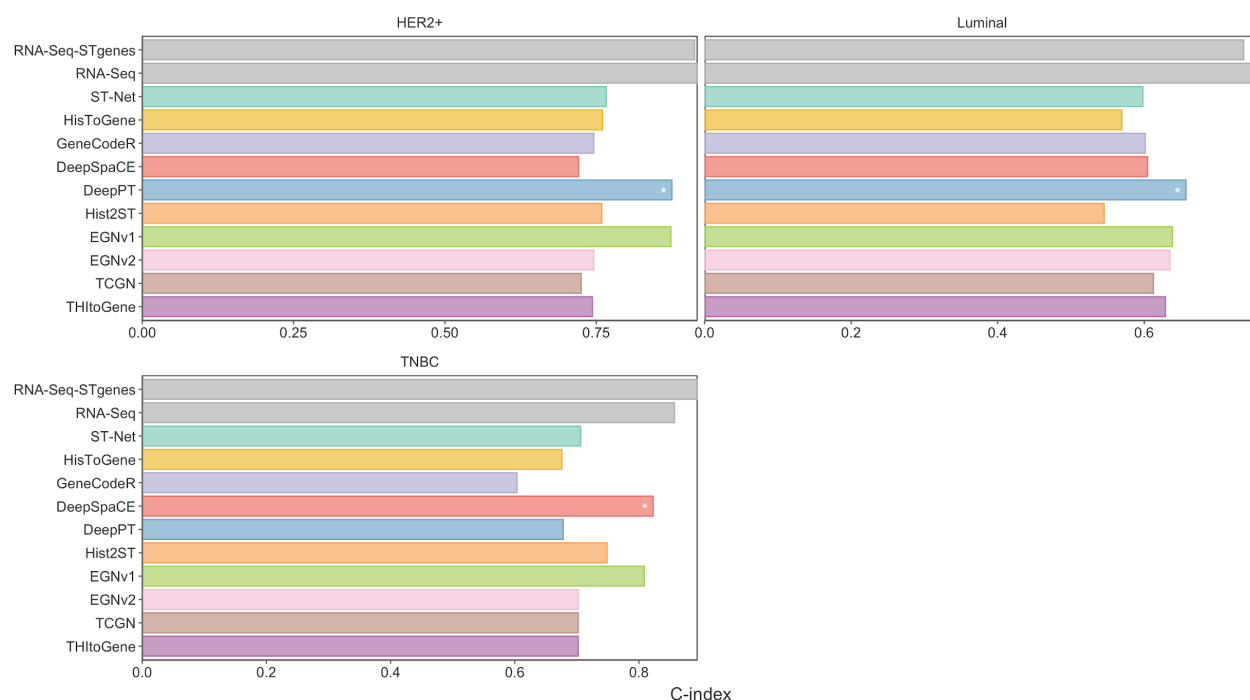

**Supplementary Fig. 15:** C-indices of multivariate cox regression models predicting survival of TCGA-BRCA patients, using RNA-Seq bulk, RNA-Seq bulk using only genes present in HER2+ ST dataset, and the predicted pseudobulk from each method. C-indices were calculated from the training data of models trained within HER2+ ( $n = 92$ ), luminal ( $n = 463$ ) and TNBC ( $n = 79$ ) breast cancer clinical subtypes. Source data are provided as a Source Data file.

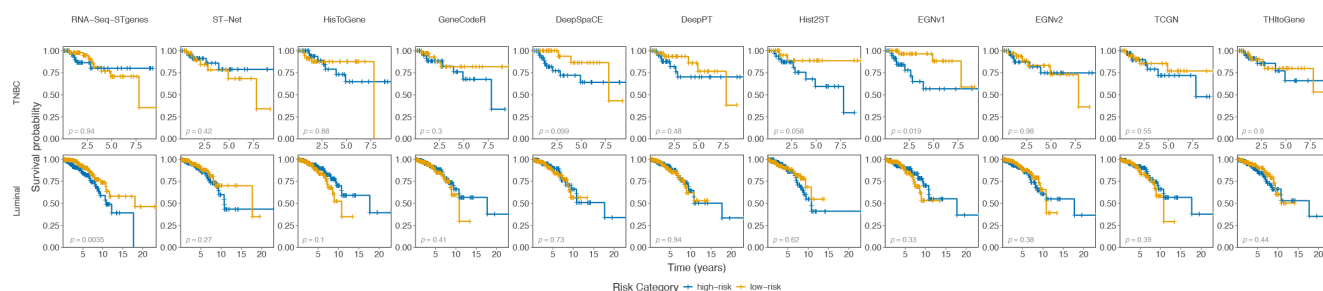

**Supplementary Fig. 16:** Kaplan-Meier curves for patients split into high and low risk groups by the median risk prediction of the multivariate cox regression models for each method in luminal ( $n = 463$ ) and TNBC ( $n = 79$ ) breast cancer subtypes. The average risk prediction from a 3-fold CV with 100 ( $n = 100$ ) repeats was used. The p-value represents the result of the two-sided log-rank test for assessing the statistical significance of differences in survival between the groups. Source data are provided as a Source Data file.



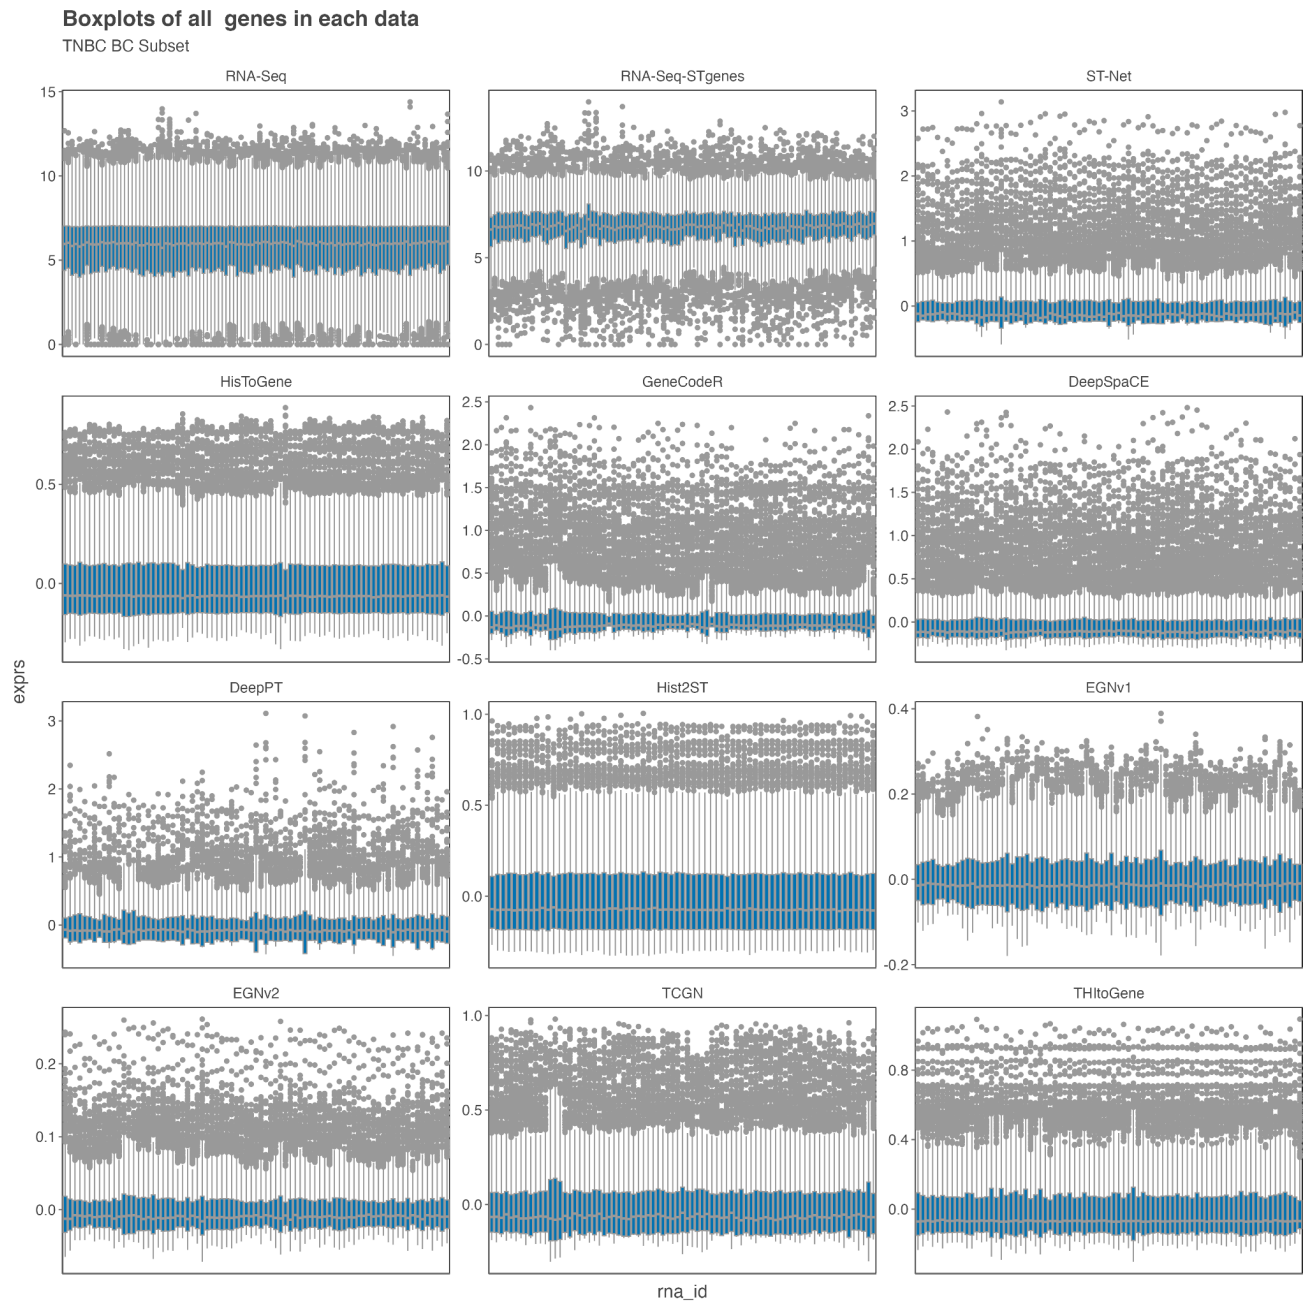

**Supplementary Fig. 17:** Boxplot of gene expression values after transformation ( $n = 15957$ ) for each sample from the TNBC subset ( $n = 79$ ) of the TCGA data and for all genes ( $n = 749$ ) that were presented in the HER2+ ST dataset. The bounds of the box correspond to the 25th percentile (first quartile) and 75th percentile (third quartile). The line within the box represents the median. The boxplot's lower whisker extends 1.5 times the interquartile range below the first quartile, while the upper whisker extends 1.5 times the interquartile range above the third quartile. Outliers are shown as individual data points. Source data are provided as a Source Data file.

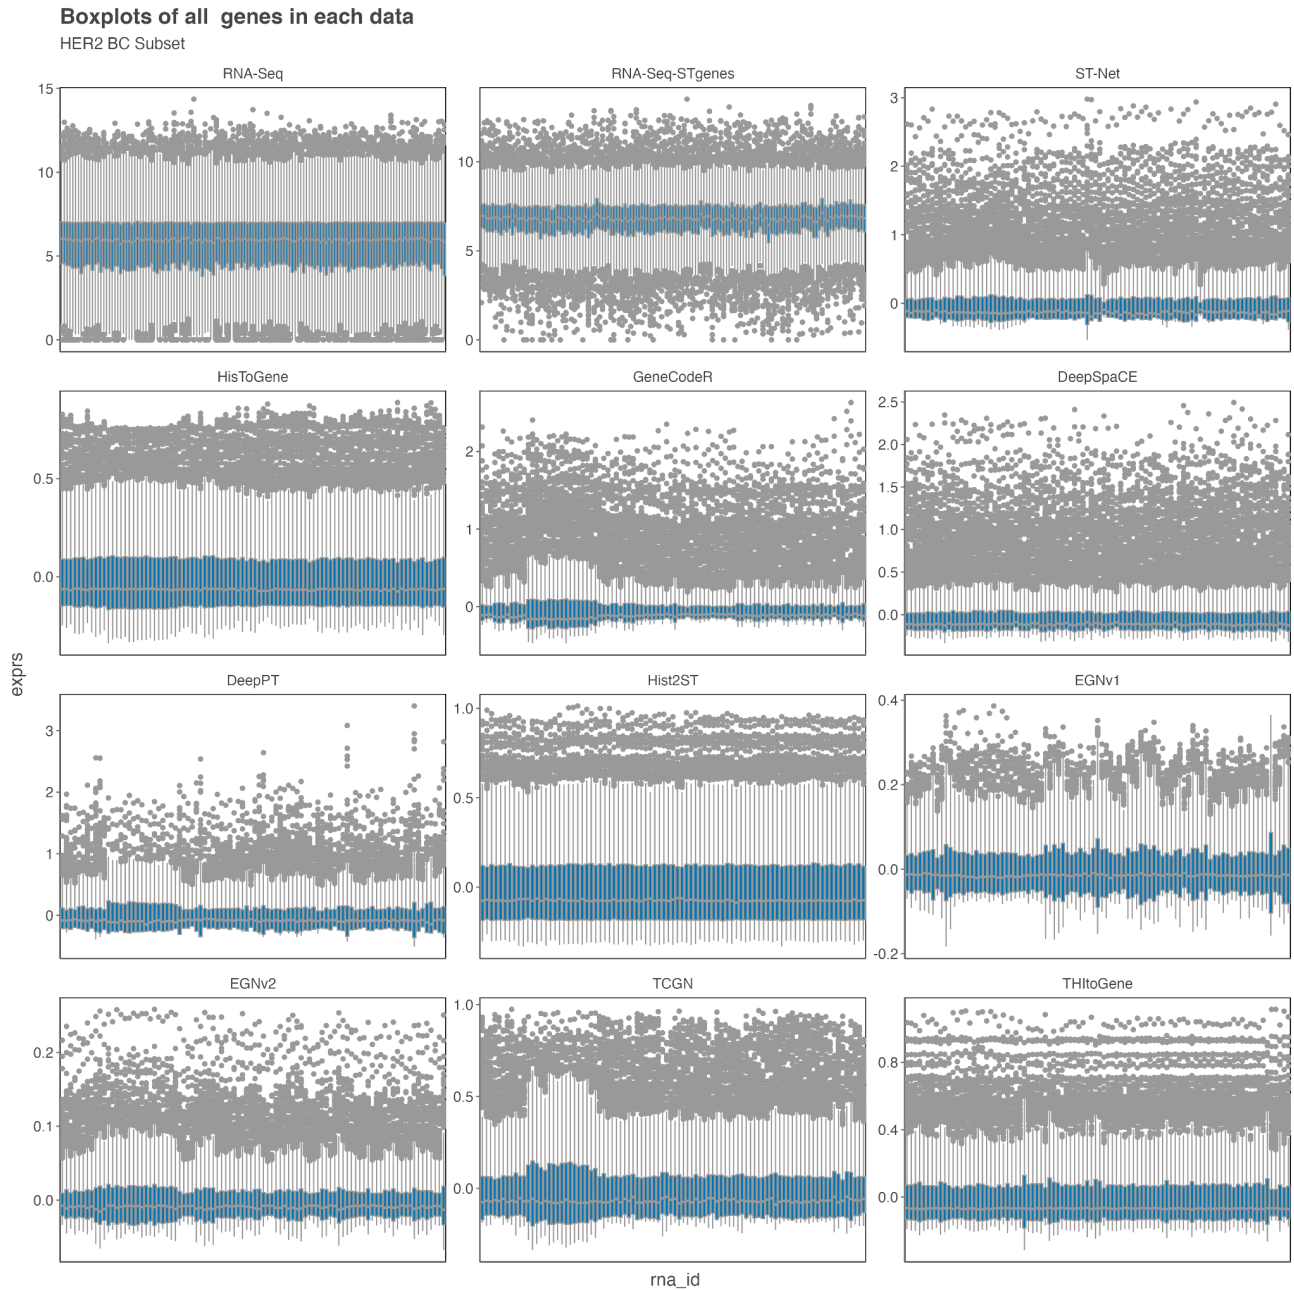

**Supplementary Fig. 18:** Boxplot of gene expression values after transformation ( $n = 15957$ ) for each sample from the HER2 subset ( $n = 92$ ) of the TCGA data and for all genes ( $n = 749$ ) that were presented in the HER2+ ST dataset. The bounds of the box correspond to the 25th percentile (first quartile) and 75th percentile (third quartile). The line within the box represents the median. The boxplot's lower whisker extends 1.5 times the interquartile range below the first quartile, while the upper whisker extends 1.5 times the interquartile range above the third quartile. Outliers are shown as individual data points. Source data are provided as a Source Data file.

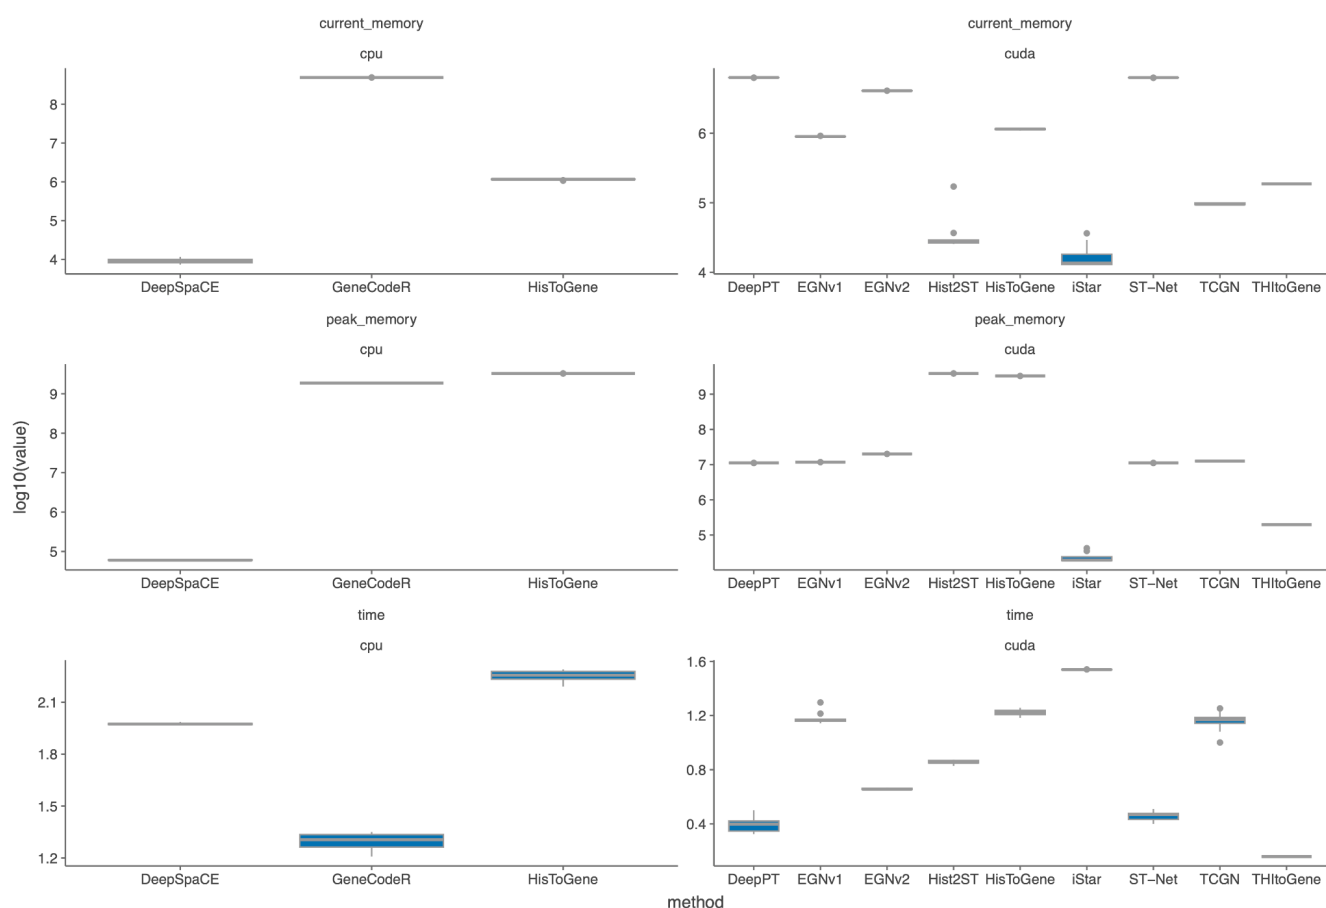

**Supplementary Fig. 19:** Boxplots of the computational efficiency of methods when trained on one histology image using 10 epochs. Metrics were measured for parallelised (cuda) and non-parallelised (cpu) training where applicable. Memory was measured in bytes and time in seconds. The bounds of the box correspond to the 25th percentile (first quartile) and 75th percentile (third quartile). The line within the box represents the median. The boxplot's lower whisker extends 1.5 times the interquartile range below the first quartile, while the upper whisker extends 1.5 times the interquartile range above the third quartile. Outliers are shown as individual data points. Source data are provided as a Source Data file.

**Supplementary Table 1: Summary of Methods predicting SGE from H&E**

| Model         | Local Features (one spot)                                                                                                  | Local + Global Features (spot-neighbourhood relations) | Global Features (spot-spatial relations) | Reference Dataset | Reference Encoder | Application method   |
|---------------|----------------------------------------------------------------------------------------------------------------------------|--------------------------------------------------------|------------------------------------------|-------------------|-------------------|----------------------|
| ST-Net        | Pretrained DenseNet 121                                                                                                    | NA                                                     | NA                                       | NA                | NA                | NA                   |
| HisToGene     | Learnable Linear Layer                                                                                                     | Super Resolution                                       | ViT                                      | NA                | NA                | NA                   |
| DeepPT        | Pretrained ResNet50 + Autoencoder + MLP                                                                                    | NA                                                     | NA                                       | NA                | NA                | NA                   |
| Hist2ST       | Convmixer                                                                                                                  | GNN - GraphSAGE                                        | Transformer                              | NA                | NA                | NA                   |
| DeepSpaCE     | VGG16                                                                                                                      | Super Resolution                                       | NA                                       | NA                | NA                | NA                   |
| GeneCodeR     | Non deep learning method                                                                                                   |                                                        |                                          |                   |                   |                      |
| EGNv1         | ViT + Exemplar                                                                                                             | NA                                                     | Exemplar                                 | Internal Dataset  | ResNet50          | Exemplar Retrieval   |
| EGNv2         | Exemplar (ResNet) + GraphSAGE + GCN                                                                                        | NA                                                     | Exemplar                                 | Internal Dataset  | ResNet18          | Exemplar Retrieval   |
| XFuse         | Statistical Model + Deep generative model                                                                                  |                                                        |                                          | ISC Data          | NA                | Fuse with H&E        |
| BLEEP         | Pretrained ResNet50                                                                                                        | NA                                                     | Contrastive Learning                     | Internal Dataset  | ResNet50 and FCN  | Contrastive Learning |
| NSL           | Stain deconvolution matrix                                                                                                 |                                                        |                                          |                   |                   |                      |
| TCGN          | CNN + ViT + GNN                                                                                                            | NA                                                     | NA                                       | NA                | NA                | NA                   |
| BrST-Net      | Trained 10 state-of-the-art CNN models and transformers then compared their performances + introduced an auxiliary network |                                                        |                                          |                   |                   |                      |
| TransformerST | CNN + cross-scale internal GNN                                                                                             | Adaptive Graph Transformer                             | Conditional Transformer                  | NA                | NA                | NA                   |
| STimage       | Pretrained ResNet50 + Negative Binomial                                                                                    | NA                                                     | NA                                       | NA                | NA                | NA                   |
| THItoGene     | Dynamic Convolution + Efficient-Capsule Module                                                                             | Graph Attention Network (GAT)                          | ViT                                      | NA                | NA                | NA                   |
| SEPAL         | Image Encoder                                                                                                              | GNN                                                    | NA                                       | NA                | NA                | NA                   |
| iStar         | HViT (super resolved features at near single-cell level)                                                                   | NA                                                     | HViT                                     | NA                | NA                | NA                   |



**Supplementary Table 2: Summary of Methods advantages, limitations, user guidance and improvement directions**

| Model     | Date of Publication | Publication                   | Advantages                                                                                       | Limitations                                                                                                                                                             | User Guidance                                                                                                                    | Improvement Directions                                                                                                 |
|-----------|---------------------|-------------------------------|--------------------------------------------------------------------------------------------------|-------------------------------------------------------------------------------------------------------------------------------------------------------------------------|----------------------------------------------------------------------------------------------------------------------------------|------------------------------------------------------------------------------------------------------------------------|
| ST-Net    | 22/06/2020          | Nature Biomedical Engineering | Simple model, straightforward implementation, consistent performance across ST and Visium data   | Low generalizability and clinical translational impact                                                                                                                  | Serve as baseline                                                                                                                | Using encoder pre-trained on larger and more diverse tissue datasets                                                   |
| HisToGene | 28/11/2021          | Pre-print                     | Suitable for handling small sample size, simple implementation, relatively high generalizability | Modest performance on SGE prediction and clinical translational impact, need to carefully set the image and position embedding dimensions, hard to train on Visium data | Use for small, labelled datasets or directly apply trained model to external datasets for SGE prediction for baseline comparison | Reduce model complexity, particularly for patch embedding, try multi-scale modules that better handle super-resolution |
| GeneCodeR | 16/01/2022          | Pre-print                     | Fast training and interpretability for R users                                                   | Modest performance                                                                                                                                                      | Explore spatial information from images to gene expression                                                                       | Consider more advanced statistical model and perform pre-processing of the H&E image stain to reduce patient effect    |
| DeepSpaCE | 08/03/2022          | Scientific Reports            | Simple implementation, relatively high generalizability and clinical translational impact        | Modest performance on SGE prediction, hard to train on Visium data                                                                                                      | Directly apply trained model to external datasets for SGE prediction as well as survival predictions for baseline comparison     | Reduce model complexity, replacing with more efficient modules for feature extraction                                  |
| DeepPT    | 09/06/2022          | Pre-print                     | Simple model, simple implementation, performing relatively well on both ST and Visium data       | Low generalizability                                                                                                                                                    | Serve as baseline                                                                                                                | Using encoder pre-trained on larger and more diverse tissue datasets                                                   |
| Hist2ST   | 20/09/2022          | Briefings in Bioinformatics   | Perform relatively well in TCGA survival analysis                                                | Complex model, need to carefully set the image and position embedding dimensions, hard to train on Visium data                                                          | Apply to survival analysis and served as a baseline                                                                              | Reduce model complexity, improve global feature representations                                                        |

|           |            |                             |                                                                                                                                                              |                                                                                                                                                                                                                                                                                                     |                                                                                                                                              |                                                                                                                                                            |
|-----------|------------|-----------------------------|--------------------------------------------------------------------------------------------------------------------------------------------------------------|-----------------------------------------------------------------------------------------------------------------------------------------------------------------------------------------------------------------------------------------------------------------------------------------------------|----------------------------------------------------------------------------------------------------------------------------------------------|------------------------------------------------------------------------------------------------------------------------------------------------------------|
| EGNv1     | 26/02/2023 | WACV                        | Potentially less data to train, performing relatively well on both ST and Visium data, enhanced robustness and relatively high clinical translational impact | Requires well-curated, diverse reference dataset, exemplar increase the overall computational cost for large reference data, need to modify the dataloader appropriately to handle new inputs                                                                                                       | Use when well-curated, high quality reference data is available, potentially can be used to explore survival analysis                        | Using encoder pre-trained on larger and more diverse tissue datasets, involve more relevant and representative reference data                              |
| EGNv2     | 26/09/2023 | Pattern Recognition         | Potentially less data to train, enhanced robustness, relatively good performance in the ST datasets                                                          | Requires well-curated, diverse reference dataset, exemplar and graph construction is time-intensive for large reference data, need to modify the dataloader appropriately to handle new inputs, hard to train on Visium data                                                                        | Use when well-curated, high quality reference data is available, can be used to explore survival analysis - especially luminal breast cancer | Using encoder pre-trained on larger and more diverse tissue datasets, involve more relevant and representative reference data                              |
| TCGN      | 25/11/2023 | Medical Image Analysis      | Capture cell organisation features (cell-cell interaction) using GNN, works better on Visium than ST data                                                    | Complex model, taking relatively more time to train                                                                                                                                                                                                                                                 | Explore and understand the effectiveness of transformer and GNN                                                                              | Reduce model complexity, improve global feature representations                                                                                            |
| THltoGene | 25/12/2023 | Briefings in Bioinformatics | Extract deep, multi-view neighbourhood features                                                                                                              | Complex model, risk of overfitting, hard coded dataloader and model settings, hard to train on Visium                                                                                                                                                                                               | Explore and understand the effectiveness of deep neighbourhood features                                                                      | Improve the integration of local and global neighbourhood features                                                                                         |
| iStar     | 02/01/2024 | Nature Biotechnology        | Enable near single-cell SGE prediction using spot-based data                                                                                                 | Infeasible to perform training and prediction across different datasets due to both image and spot resolution difference and the requirement of consistent feature embedding dimension, the published code needs to be modified to dynamic dataloader to train more whole H&E embedding at one time | Explore finer single-cell spatial features even when only spot-based SGE data is available, works better on high-resolution image data       | Improve spot to single-cell gene expression prediction method, which better allocates spot-based gene expression to the large number of cells within spots |

**Supplementary Table 3: Top 20 predicted genes by correlation in HER2+ ST data.**

| gene            | EGN v2      | Deep PT | Deep Space | Gene Code R | HisTo Gene | Hist 2ST | ST-Net | EGN v1 | TCGN | THIto Gene | iStar | overall_mean_cor |
|-----------------|-------------|---------|------------|-------------|------------|----------|--------|--------|------|------------|-------|------------------|
| <i>GNAS</i>     | <b>0.47</b> | 0.41    | 0.38       | 0.29        | 0.35       | 0.26     | 0.28   | 0.19   | 0.30 | 0.23       | 0.26  | 0.31             |
| <i>FASN</i>     | <b>0.46</b> | 0.40    | 0.32       | 0.28        | 0.31       | 0.21     | 0.37   | 0.18   | 0.29 | 0.20       | 0.28  | 0.30             |
| <i>SCD</i>      | <b>0.42</b> | 0.34    | 0.24       | 0.15        | 0.28       | 0.22     | 0.31   | 0.13   | 0.27 | 0.21       | 0.21  | 0.25             |
| <i>MYL12B</i>   | <b>0.33</b> | 0.30    | 0.23       | 0.19        | 0.28       | 0.26     | 0.27   | 0.13   | 0.24 | 0.22       | 0.15  | 0.24             |
| <i>CLDN4</i>    | <b>0.36</b> | 0.31    | 0.2        | 0.23        | 0.28       | 0.21     | 0.27   | 0.13   | 0.25 | 0.16       | 0.18  | 0.24             |
| <i>FN1</i>      | <b>0.38</b> | 0.26    | 0.18       | 0.17        | 0.27       | 0.24     | 0.20   | 0.15   | 0.18 | 0.22       | 0.17  | 0.22             |
| <i>RHOB</i>     | <b>0.30</b> | 0.29    | 0.25       | 0.19        | 0.25       | 0.25     | 0.21   | 0.10   | 0.21 | 0.21       | 0.11  | 0.22             |
| <i>STMN1</i>    | <b>0.33</b> | 0.28    | 0.24       | 0.15        | 0.26       | 0.23     | 0.22   | 0.11   | 0.20 | 0.18       | 0.17  | 0.21             |
| <i>HLA.DRA</i>  | <b>0.37</b> | 0.36    | 0.13       | 0.21        | 0.19       | 0.18     | 0.23   | 0.17   | 0.17 | 0.12       | 0.13  | 0.20             |
| <i>TMBIM6</i>   | <b>0.33</b> | 0.28    | 0.14       | 0.17        | 0.23       | 0.20     | 0.25   | 0.10   | 0.16 | 0.18       | 0.17  | 0.20             |
| <i>TMEM123</i>  | <b>0.32</b> | 0.27    | 0.13       | 0.16        | 0.24       | 0.22     | 0.21   | 0.10   | 0.20 | 0.18       | 0.17  | 0.20             |
| <i>CCT4</i>     | <b>0.28</b> | 0.27    | 0.19       | 0.14        | 0.25       | 0.22     | 0.23   | 0.09   | 0.20 | 0.19       | 0.13  | 0.20             |
| <i>FADS2</i>    | <b>0.32</b> | 0.27    | 0.10       | 0.26        | 0.21       | 0.15     | 0.25   | 0.12   | 0.19 | 0.14       | 0.15  | 0.20             |
| <i>NDUFB2</i>   | <b>0.28</b> | 0.26    | 0.14       | 0.18        | 0.24       | 0.25     | 0.22   | 0.10   | 0.17 | 0.21       | 0.10  | 0.20             |
| <i>PRKCSH</i>   | <b>0.31</b> | 0.30    | 0.11       | 0.23        | 0.21       | 0.16     | 0.26   | 0.11   | 0.17 | 0.12       | 0.14  | 0.20             |
| <i>HMGB2</i>    | <b>0.30</b> | 0.24    | 0.23       | 0.13        | 0.23       | 0.23     | 0.21   | 0.07   | 0.19 | 0.18       | 0.12  | 0.19             |
| <i>CRACR2B</i>  | <b>0.30</b> | 0.26    | 0.14       | 0.20        | 0.21       | 0.16     | 0.26   | 0.09   | 0.22 | 0.13       | 0.15  | 0.19             |
| <i>SRSF1</i>    | <b>0.30</b> | 0.26    | 0.20       | 0.14        | 0.23       | 0.21     | 0.23   | 0.08   | 0.22 | 0.17       | 0.09  | 0.19             |
| <i>CD74</i>     | <b>0.34</b> | 0.38    | 0.21       | 0.18        | 0.05       | 0.05     | 0.31   | 0.17   | 0.17 | 0.01       | 0.20  | 0.19             |
| <i>HNRNPUL2</i> | <b>0.29</b> | 0.27    | 0.17       | 0.20        | 0.21       | 0.18     | 0.22   | 0.10   | 0.19 | 0.14       | 0.01  | 0.19             |

**Supplementary Table 4: Top 20 predicted genes by correlation in cSCC ST data.**

| gene          | EGN v2      | Deep PT | Deep Space | Gene Code R | HisTo Gene | Hist2 ST | ST-Net | EGN v1 | TCGN | THIto Gene | iStar | overall_mean_cor |
|---------------|-------------|---------|------------|-------------|------------|----------|--------|--------|------|------------|-------|------------------|
| <i>PFN1</i>   | <b>0.53</b> | 0.41    | 0.08       | 0.12        | 0.12       | 0.27     | 0.13   | 0.49   | 0.21 | 0.23       | 0.32  | 0.26             |
| <i>RPL9</i>   | <b>0.52</b> | 0.36    | 0.06       | 0.07        | 0.16       | 0.24     | 0.16   | 0.50   | 0.22 | 0.23       | 0.39  | 0.26             |
| <i>TAGLN2</i> | <b>0.50</b> | 0.38    | 0.04       | 0.10        | 0.23       | 0.22     | 0.16   | 0.42   | 0.23 | 0.21       | 0.37  | 0.26             |
| <i>RPS17</i>  | <b>0.51</b> | 0.34    | 0.05       | 0.10        | 0.19       | 0.25     | 0.13   | 0.46   | 0.21 | 0.23       | 0.37  | 0.26             |
| <i>RPL8</i>   | <b>0.53</b> | 0.38    | 0.04       | 0.02        | 0.14       | 0.22     | 0.17   | 0.49   | 0.19 | 0.21       | 0.41  | 0.26             |
| <i>PKP1</i>   | <b>0.52</b> | 0.33    | -0.09      | 0.13        | 0.27       | 0.19     | 0.19   | 0.49   | 0.19 | 0.17       | 0.36  | 0.25             |
| <i>RPS4X</i>  | <b>0.49</b> | 0.36    | 0.06       | 0.01        | 0.22       | 0.22     | 0.17   | 0.46   | 0.19 | 0.22       | 0.37  | 0.25             |
| <i>RPL36</i>  | <b>0.53</b> | 0.36    | 0.04       | 0.07        | 0.12       | 0.22     | 0.16   | 0.48   | 0.19 | 0.22       | 0.36  | 0.25             |
| <i>RPL5</i>   | <b>0.50</b> | 0.34    | 0.06       | 0.08        | 0.17       | 0.23     | 0.14   | 0.43   | 0.22 | 0.21       | 0.36  | 0.25             |
| <i>PTMA</i>   | <b>0.48</b> | 0.36    | 0.03       | 0.11        | 0.14       | 0.24     | 0.11   | 0.40   | 0.29 | 0.23       | 0.33  | 0.25             |
| <i>RPL24</i>  | <b>0.49</b> | 0.37    | 0.03       | 0.06        | 0.18       | 0.21     | 0.22   | 0.44   | 0.19 | 0.18       | 0.34  | 0.25             |
| <i>RPL18</i>  | <b>0.49</b> | 0.33    | 0.01       | 0.01        | 0.19       | 0.24     | 0.23   | 0.43   | 0.18 | 0.25       | 0.34  | 0.25             |
| <i>HLA.A</i>  | <b>0.48</b> | 0.39    | 0.07       | 0.02        | 0.17       | 0.22     | 0.11   | 0.45   | 0.19 | 0.22       | 0.36  | 0.24             |
| <i>SFN</i>    | <b>0.57</b> | 0.43    | -0.12      | 0.11        | 0.16       | 0.17     | 0.25   | 0.53   | 0.07 | 0.11       | 0.40  | 0.24             |
| <i>GSTP1</i>  | <b>0.54</b> | 0.38    | -0.03      | 0.08        | 0.19       | 0.18     | 0.18   | 0.49   | 0.15 | 0.16       | 0.35  | 0.24             |
| <i>ACTB</i>   | <b>0.52</b> | 0.41    | 0.08       | 0.11        | 0.06       | 0.18     | 0.14   | 0.47   | 0.14 | 0.17       | 0.37  | 0.24             |
| <i>ANXA2</i>  | <b>0.49</b> | 0.39    | 0          | 0.12        | 0.15       | 0.18     | 0.19   | 0.44   | 0.17 | 0.18       | 0.34  | 0.24             |
| <i>TMSB10</i> | <b>0.50</b> | 0.40    | 0.08       | 0.07        | 0.10       | 0.21     | 0.12   | 0.44   | 0.18 | 0.20       | 0.37  | 0.24             |
| <i>ACTG1</i>  | <b>0.52</b> | 0.41    | 0          | 0.08        | 0.14       | 0.20     | 0.20   | 0.46   | 0.12 | 0.15       | 0.38  | 0.24             |
| <i>PPIA</i>   | <b>0.49</b> | 0.34    | 0          | 0.12        | 0.23       | 0.22     | 0.12   | 0.40   | 0.24 | 0.19       | 0.29  | 0.24             |

## Supplementary Method 1

### iStar

Due to variations in spatially resolved transcriptomics (SRT) technologies, H&E images from different datasets required specific rescaling. For the HER2+ ST dataset, the original pixel size was 2  $\mu\text{m}$  with a spot radius of 50  $\mu\text{m}$ ; therefore, images were upscaled so that a 16 $\times$ 16 pixel patch represented a single cell. After rescaling, each spot contained approximately 125 cells. In the cSCC ST dataset, with a pixel size of 0.8  $\mu\text{m}$  and a spot radius of 55  $\mu\text{m}$ , images were upscaled, resulting in each spot containing about 150 cells. Conversely, the Visium-Kidney dataset had a pixel size of 0.22  $\mu\text{m}$  and a spot radius of approximately 24  $\mu\text{m}$ , requiring a downscaling, which led to spots containing around 30 cells.

Practical implementation of iStar requires consistency in image size, as well as image and spot resolutions, when training and testing across datasets. After rescaling to make a 16 $\times$ 16 patch represent a single cell, images from datasets with different resolutions vary significantly in size. Since image embeddings need to have the same dimension to be trained together, resizing can lead to information loss, requiring input images to have consistent dimensions. This requirement posed challenges when attempting to include TCGA and Visium-HER2+ as external validation data or perform cross-study analyses between the two breast cancer data Visium-Hercep-Test2+ and Visium-HER2+. For the HER2+ ST dataset, the upscaled image embeddings require a large amount of computational memory, making it challenging to train on multiple images simultaneously. We performed a subset evaluation for iStar by using only the first image slide from each training patient and predicting on the first slide from each test patient within each fold. An exception was made for patient G, as tissue annotation is available for the second slide.
